# Supplementary material
Source: Springer Nature journal article supplement (https://www.springermedizin.de/resource/supplementary/12957_2008_508_MOESM5_ESM.pdf/9564872)

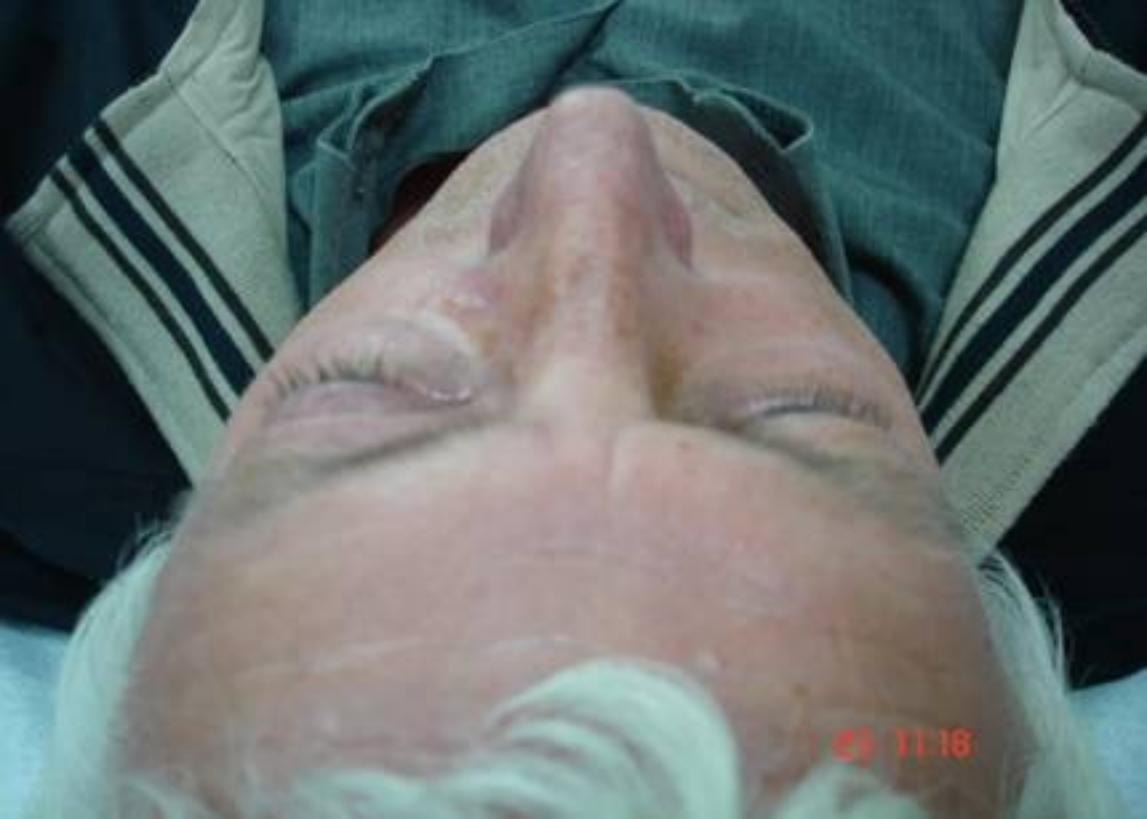

09 11 18

Supplement: MOESM5 [file 9564872]
